# Supplementary material for: Dipteran parasitoids as biocontrol agents
Source: Springer Nature journal article supplement (doi:10.1007/s10526-025-10317-1), 2025-03-17
Supplement: MOESM1 [file 10526_2025_10317_MOESM1_ESM.docx]

**Supplementary** **Material S1**

**Additional references**

Alam MM, Bennet FD, Carl KP (1971) Biological control of *Diatraea saccharalis* (F.) in Barbados by *Apanteles flavipes* Cam. and *Lixophaga diatraeae* T.T. Entomophaga 16(2):151–158.

Assefa Y, Conlong DE, Berg J van den, Mitchell A (2010) Distribution of sugarcane stem borers and their natural enemies in small-scale farmers’ fields, adjacent margins and wetlands of Ethiopia. Int J Pest Manag 56:233–241.

Barraclough DA (2004) A taxonomic review of *Sturmiopsis* Townsend, 1916, an Old World genus of Tachinidae (Diptera) parasitising economically significant lepidopterous stem borers. Afr Invertebr 45:7–19.

Baudet JL (1980) Recherches sur la reproduction dans le genre *Sarcophaga* (insectes, diptères): appareil génital femelle, oeufs et particularités liées au mode d'incubation. PhD thesis, Rennes, France.

Blumenthal EM, Fusco RA, Reardon RC (1979) Augmentative release of two established parasite species to suppress populations of the gypsy moth. J Econ Entomol 72:281–288.

Borgmeier T (1971) Further studies on phorid flies, mainly of the Neotropical Region (Diptera, Phoridae). Stud Entomol 14:1–172.

Bosque-Pérez NA, Ubeku JA, Polaszek A (1994) Survey for parasites of *Sesamia calamistis* (Lep.: Noctuidae) and *Eldana saccharina* (Lep.: Pyralidae) in southwestern Nigeria. Entomophaga 39:367–376.

Campbell RW (1963) Some ichneumonid-sarcophagid interactions in the gypsy moth *Porthetria dispar* (L.) (Lepidoptera: Lymantriidae). Can Entomol 95:337–345.

Carter PJ, Baker GH (1997) Biological control of white and conical snails. Farm Sys Dev 1997:113–114.

Chen L, Fadamiro HY (2018) *Pseudacteon* phorid flies: host specificity and impacts on *Solenopsis* fire ants. Ann Rev Entomol 63:47–67.

Chinwada P, Overholt WA (2001) Natural enemies of maize stem borers on the highveld of Zimbabwe. Afr Entomol 9:67–75

Chong M (1968) Notes and exhibitions: releases of beneficial insects. Proc Hawaii Entomol Soc 20 (1): 3

Conlong DE (1994) A review and perspectives for the biological control of the African sugarcane stalkborer *Eldana saccharina* Walker (Lepidoptera: Pyralidae). Agric Ecosyst Environ 48:9–17

Conlong DE (2001) Biological control of indigenous African stem borers: what do we know? Int J Trop Insect Sci 21:267–274

Coupland JB, Baker G (1994) Host distribution, larviposition behaviour and generation time of *Sarcophaga penicillata* (Diptera: Sarcophagidae), a parasitoid of conical snails. Bull Entomol Res 84:185–189

Cugala D, Schulthess F, Ogol CPO, Omwega CO (2006) Assessment of the impact of natural enemies on stem borer infestations and yield loss in maize using selected insecticides in Mozambique. Ann Soc Entomol Fr 42:503–510

Disney RHL (1994) Scuttle flies: the Phoridae. Chapman and Hall.

Fleming WE (1968) Biological control of the Japanese beetle. US Dep Agric Tech Bull, 1383. USDA, Washington, DC, 78 pp.

Galichet PF (1975) Équilibres observés entre les populations des tachinaires parasites du genre *Diatraea* en Guadeloupe (Antilles Françaises). Ann Soc Entomol Fr (NS) 4:791–807.

Gounou S, Jiang N, Schulthess F (2009) Long-term seasonal fluctuations of lepidopteran cereal stem borers and their natural enemies on maize and wild host plants in southern Benin. Insect Sci 16:329–341.

Hodson AC (1939) *Sarcophaga aldrichi* Parker as a parasite of *Malacosoma disstria* Hbn. J Econ Entomol 39:396–401.

Lavigne RJ, Pfadt RE (1966) Parasites and predtors of Wyoming rangeland grasshoppers. University Wyoming Agricultural Experiment Station Scientific Monographs 3:1–31.

Léonide J, Léonide J-C (1986) Les diptères sarcophagidés endoparasites des orthoptères français – essai biotaxonomie. Université de Provence (Aix-en-Provence), Aix Marseille Unversité Éditions, Marseille, France.

Lipa JJ (1976) Arthropods (Arthropoda) introduced into Poland during 1959-1964 by the Institute of Plant protection for the biological control of plant pests. Prace Naukowe IOR. Poznan 18:165–166.

Mehdiabadi NJ, Gilbert LE (2002) Colony–level impacts of parasitoid flies on fire ants. Proc Soc London. Series B: Biological Sciences 269 (1501):1695–1699.

Morrison LW (2012) Biological control of *Solenopsis* fire ants by *Pseudacteon* parasitoids: theory and practice. Psyche 2012: 424817

Parry D (1995) Larval and pupal parasitism of the forest tent caterpillar, *Malacosoma disstria* Huebner (Lepidoptera: Lasiocampidae), in Alberta, Canada. Can Entomol 127:877–893.

Porter SD (1998) Biology and behavior of *Pseudacteon* decapitating flies (Diptera: Phoridae) that parasitize *Solenopsis* fire ants (Hymenoptera: Formicidae). Fla Entomol 81(3):292–309.

Rettenmeyer CW, Akre RD (1968) Ectosymbiosis between phorid flies and army ants. Ann Entomol Soc Am 61:1317–1326.

Smith CW (1940) An exchange of grasshopper parasites between Argentina and Canada with notes on parasitism of native grasshoppers. Annu Rep Entomol Soc Ontario 70:57–62.

Stireman, JO, Singer MS (2018) Tritrophic niches of insect herbivores in an era of rapid environmental change. Curr Opin Insect Sci 29:117–125.

Thompson PH (1978a) An infestation of miltogrammine Sarcophagidae (Diptera: Sarcophagidae) in a population of *Hybomitra lasiophthalma* (Macquart) (Diptera: Tabanidae). Proc Entomol Soc Washington 80:373-379.

Thompson PH (1978b) Parasitism of adult *Tabanus subsimilis subsimilis* Bellardi (Diptera: Tabanidae) by a miltogrammine sarcophagid (Diptera: Sarcophagidae). Proc Entomol Soc Washington 80:69-74.

Tschinkel WR (1987) Fire ant queen longevity and age: estimation by sperm depletion. Ann Entomol Soc Am 80(2):263–266.

Vargas G, Gómez LA, Michaud JP (2015) Sugarcane stem borers of the Colombian Cauca River Valley: current pest status, biology, and control. Fla Entomol 98(2):728–735.

Verves YG (1982) Familie 64 h: Sarcophaginae. in: Lindner E (ed) Die Fliegen der palaearktischen Region. E. Schweizerbart'sche Verlagsbuchhandlung, Stuttgart, pp 235–296.

Whitmore D (2011) New taxonomic and nomenclatural data on *Sarcophaga* (*Heteronychia*) (Diptera: Sarcophagidae), with description of six new species. Zootaxa 2778:1–57.

Whitmore D, Pape T, Cerretti P (2013) Phylogeny of *Heteronychia*: the largest lineage of *Sarcophaga* (Diptera: Sarcophagidae). Zool J Linnean Soc 169:604–639.

Wuellner CT, Dall’Aglio-Holvorcem CG, Benson WW, Gilbert LE (2002) Phorid fly (Diptera: Phoridae) oviposition behavior and fire ant (Hymenoptera: Formicidae) reaction to attack differ according to phorid species. Ann Entomol Soc Am 95(2):257–266.

Zacaro AA, Porter SD (2003) Female reproductive system of the decapitating fly *Pseudacteon wasmanni* Schmitz (Diptera: Phoridae). Arthropod Struct Dev 31(4):329–337.

Zhou G, Overholt WA, Kimani-Njogu SW (2003) Species richness and parasitism in an assemblage of parasitoids attacking maize stem borers in coastal Kenya. Ecol Entomol 28:109–118.
