# Supplementary material for: Dipteran parasitoids as biocontrol agents
Source: Springer Nature journal article supplement (doi:10.1007/s10526-025-10317-1), 2025-03-17
Supplement: MOESM2 [file 10526_2025_10317_MOESM2_ESM.docx]

**Supplementary Table S1.** Examples of applied biological control programs using tachinid parasitoids and described in the text. Type of biological control: C = classical; A = augmentative. Outcome of the programs: U = unknown results; F = failed to become established; E= established. Impact on target pest: U = unknown; L= established, limited impact observed; S = established; substantial impact observed. NA = not applicable. * = information missing; NE= natural enemy. The tachinid species are listed in alphabetical order.

| Tachinid species | Target insect | Target crop | Type of BC | Country of origin of the NE | Country of application | Date of introduction/ augmentation | Outcome of the program | Impact on target pest | Reference |
| --- | --- | --- | --- | --- | --- | --- | --- | --- | --- |
| *Acaulona peruviana* | *Dysdercus spp.* | cotton | C | * | Caribbean Islands | * | F | NA | Van Lenteren and Bueno (2020) |
| *Billaea claripalpis* | sugarcane borers | sugarcane | C | Mexico | Caribbean Islands | 1954 | E |  | Galichet (1975) |
| C | Bolivia | Peru | 1969 - 2000 | E | S | Pruett (1996) |
| C | Colombia | Brazil | 1970 | E | * | Bueno and van Lenteren (2002) |
| C/A | Peru | Ecuador | 1965 | NA | S | Risco-Briceño (1996) |
| A | Peru | Peru | * | NA. | S | Mujica & Whu (2020) |
| *Diatraea saccharalis* | sugarcane | A | Brazil | NA | the 1960s | NA |  | Parra (2014) |
| *Blepharipa pratensis* | *Lymantria dispar* | broad leaf trees | C  A | Europe | many US states | 1905-1911  until 1933 | E | S | Howard and Fiske (1911); Grenier (1988) |
| *Ceromasia auricaudata* | *Choristoneura murinana* | *Abies* species | C | North America | Poland | late 1960s | E | U | Gerber and Schaffner (2016) |
| *Compsilura concinnata* | *Euproctis chrysorrhoea* | broad leaf trees | C | Europe | North America | 1906 | E | S | Howard and Fiske (1911); (Grenier 1988) |
| *Lymantria dispar* | C | many US States | 1905-1911 | E | S |
|  |  |  | A | 1976 |  |  | Blumenthal et al. (1979) |
| *Cyzenis albicans* | *Operophtera brumata* | forests | C | Europe | Canada | 1955-60 | E | S | Hulme and Green (1984) |
| forests and shade trees | C | British Columbia | northeastern United States | 2005 | E | S | Elkinton et al. (2021) |
| *Eucelatoria* sp. | *Helicoverpa armigera* | cotton | C | US | Caribbean Islands | 1972 | F | NA | Yaseen (1975) |
| *Exorista larvarum* | *Lymantria dispar* | broad leaf trees | C | Europe | northern US | 1905-1911 | E | L | Sabrosky and Reardon (1976) |
| *Genea jaynesi* | sugarcane borers | sugarcane | C | Colombia | Caribbean Islands | * | * | * | Jiménez et al. (2018) |
| *Istocheta aldrichi* | *Popillia japonica* | agricultural crops, ornamental plants, pastures | C | Eastern Palearctic region | Azores Islands (Terceira) | 1993 | F | NA | Simões and Grenier (1999) |
| C | Japan | US | the 1920s | E | L | Fleming (1968) |
|  |  |  | C | Canada (greater Montreal and Ottawa regions) | Canada (British Columbia) | 2023 | E? | U | Makovetski and Abram (2024) |
| *Lixadmontia franki* | *Metamasius callizona* | bromeliads | C | Honduras | Florida | 2007-2008 | E? | L? | Cooper et al. (2011) |
| *Lixophaga diatraeae* | sugarcane borers | sugarcane | C and A | Cuba | southern US | * | E | S | King et al. (1981); Grenier (1988) |
| C | Caribbean Islands | Antigua, Dominica, Guadaloupe, and Saint Kitts | the 1930s | E | S | Grenier (1988) |
| A | Cuba | Cuba | 1914 | N. | S | Márquez et al. (2019) |
| *Chilo infuscatellus* | sugarcane | C | * | China | * | E | S | Deng et al. (2010) |
| *Lydella jalisco* | *Eoreuma loftini* | rice | C | Mexico | Texas | 1998 | E | * | Lauzière et al. (2001) |
| *Lydella* *minense* | sugarcane borers | sugarcane | C | Brazil | Guadaloupe, Martinique, and Santa Lucia | 1933 | E | S | Myers (1935); Cleare (1939) |
| C | Brazil | Barbados and Antigua | 1933 | F | NA | Myers (1935; Cleare 1939; Bueno and van Lenteren (2002) |
| C | Colombia | Peru | 1970 | E | S | Gaviria (1998) |
| C | Cuba | * | 1945 | E | S | Scaramuzza 1945 |
| A | Venezuela | Venezuela | the 1950s | NA | S | Ferrer (2012); Ferrer and Guédez (1990) |
|  | *Diatraea saccharalis* | sugarcane | A | Brazil | NA | the 1960s | NA |  | Parra (2014) |
| *Lydella thompsoni* | *Ostrinia nubilalis* | corn | C | Europe and The Orient | US | from 1920 to 1938 | E | S | Romig et al. (1985)  Mason et al. (1994) |
| *Myiopharus doryphorae* | *Leptinotarsa decemlineata* | potato | C | North America | Poland | 1967 | E | U | Lipa (1976) |
| *Nemorilla maculosa* | *Maruca vitrata* | cowpea | C | Taiwan | Benin | * | U | NA | Agbessenou et al. (2018) |
| *Ormia depleta* | mole crickets | pastures and turf | C | Brazil | Florida | * | E | S | Frank and Parkman (1999) |
| C | Bolivia | southern US | * | E | S | Franco et al. (2020) |
| *Palpozenillia diatraeae* | sugarcane borers | sugarcane | A | Bolivia | Bolivia | 1969 - 2000 | NA | S | Pruett (1996) |
| *Parasetigena sylvestris* | *Lymantria dispar* | broad leaf trees | C | Europe | northern US | 1905-1911 | E | L | Sabrosky and Reardon (1976) |
| *Phasia chilensis* | *Dysdercus* spp. | cotton | C | * | Caribbean Islands | * | F | NA | Van Lenteren and Bueno (2020) |
| *Smidtia fumiferanae* | *Choristoneura murinana* | Abies species | C | North America | Poland | late 1960s | E | U | Gerber and Schaffner (2016) |
| *Sturmiopsis parasitica* | *Eldana saccharina* | Sugarcane | C | Benin  Ghana | South Africa | 1999 | U | NA | CABI BIOCAT (2025) |
| *Trichopoda pennipes* | *Nezara viridula* | cowpeas and sweet corn | C | Argentina | Australia | 1996-1999 | E | L | Coombs and Sands (2000) |
